# Supplementary material
Source: PubMed Central journal article supplement (PMC7040888)
Supplement: mmc2.pdf [file mmc2.pdf]

## **Stellaris® FISH Probes, Custom Assay with Quasar® 570 Dye: rat beta actin**

#1: acgacgagcgcagcgatatac  
#2: cacgatggaggggaagacgg  
#3: ggtacttcagggtcaggatg  
#4: gtgacaatgccgtgtcaat  
#5: aaatcttccatatacgtcc  
#6: acacgcagctcattgtagaa  
#7: cttttcacggtggccttag  
#8: ggtctcaaacaatgatctggg  
#9: aacacagcctggatggctac  
#10: gtacgaccagaggcatacag  
#11: ctccggagtccatcacaaatg  
#12: tcatagatgggcacagtgtg  
#13: cagacgcaggatggcatgag  
#14: atcttcatgaggtagtctgt  
#15: ctgtgggtgggaagctgtag  
#16: taatgcacgcacgattcc  
#17: catctctgctcgaagtcta  
#18: tcattgccgatagtgatgac  
#19: tagtttcatggatgccacag  
#20: acgtcacacttcatgatgga  
#21: atagaggtctttacggatgt  
#22: caccagacagcactgtgttg  
#23: caatgcctgggtacatggtg  
#24: gatcttcatgggtctaggag  
#25: gctcaggaggagcaatgatc  
#26: ccaatccacacagagtactt  
#27: acagtgaggccaggatagag  
#28: actcatcgtactcctgcttg  
#29: agaagcatttgcggtgcac

## **shRNA target rat ANXA11**

#1: ggatatccgagcagagtataa  
#2: ggaagatcctgctgaagatct  
#3: gccaacatgtctggaacattc  
#4: ggtcctgtttgatgtctatga
